# Supplementary material for: How does the lifetime of detrained cirrus impact the high-cloud radiative effect in the tropics?
Source: Copernicus journal article supplement (doi:10.5194/acp-25-5617-2025), 2025-06-06
Supplement: Supplementary file 1 [file acp-25-5617-2025-supplement.pdf]

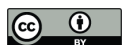

*Supplement of*

**How does the lifetime of detrained cirrus impact the high-cloud radiative effect in the tropics?**

**George Horner and Edward Gryspeerdt**

*Correspondence to:* George Horner (g.horner20@imperial.ac.uk)

The copyright of individual parts of the supplement might differ from the article licence.

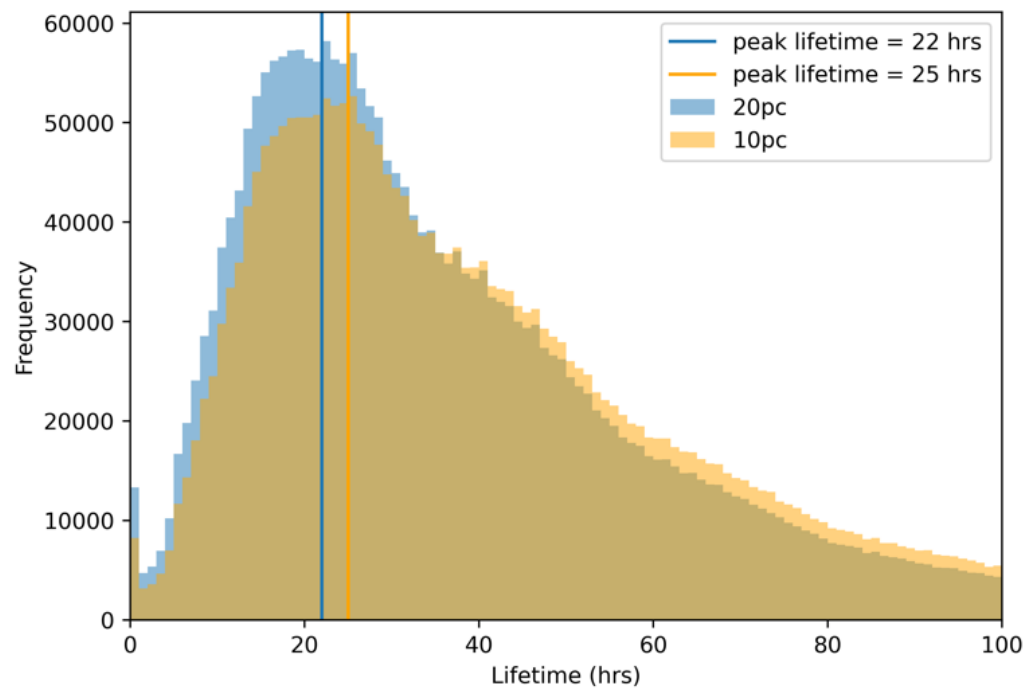

Figure S1: Histogram of lifetimes of detrained cirrus using a 20% threshold, and a 10% threshold for the lifetime cutoff point.

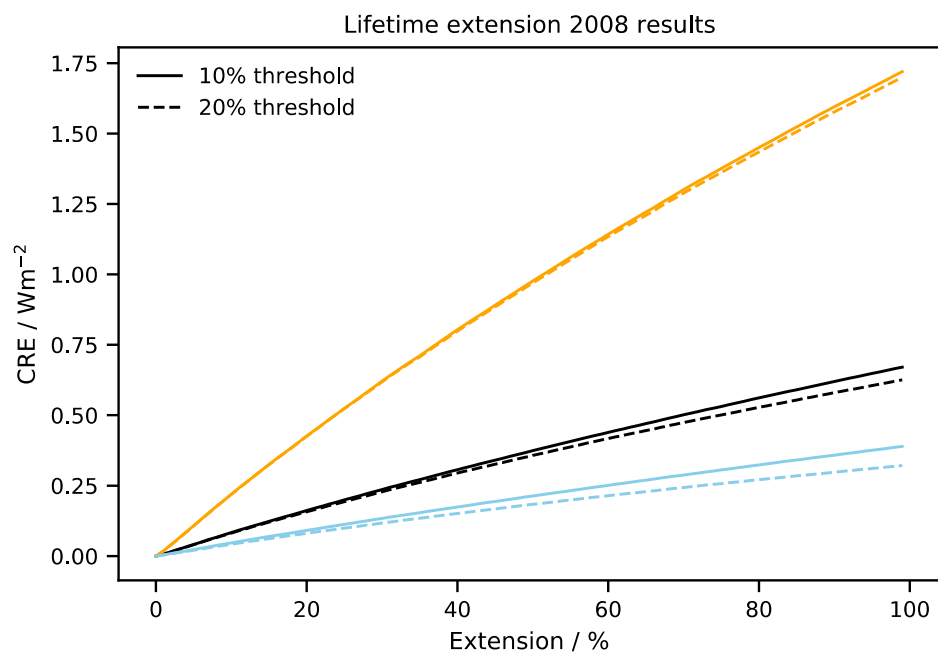

Figure S2: Change in the lifetime extension CRE using the two different calculated cutoffs from S1.

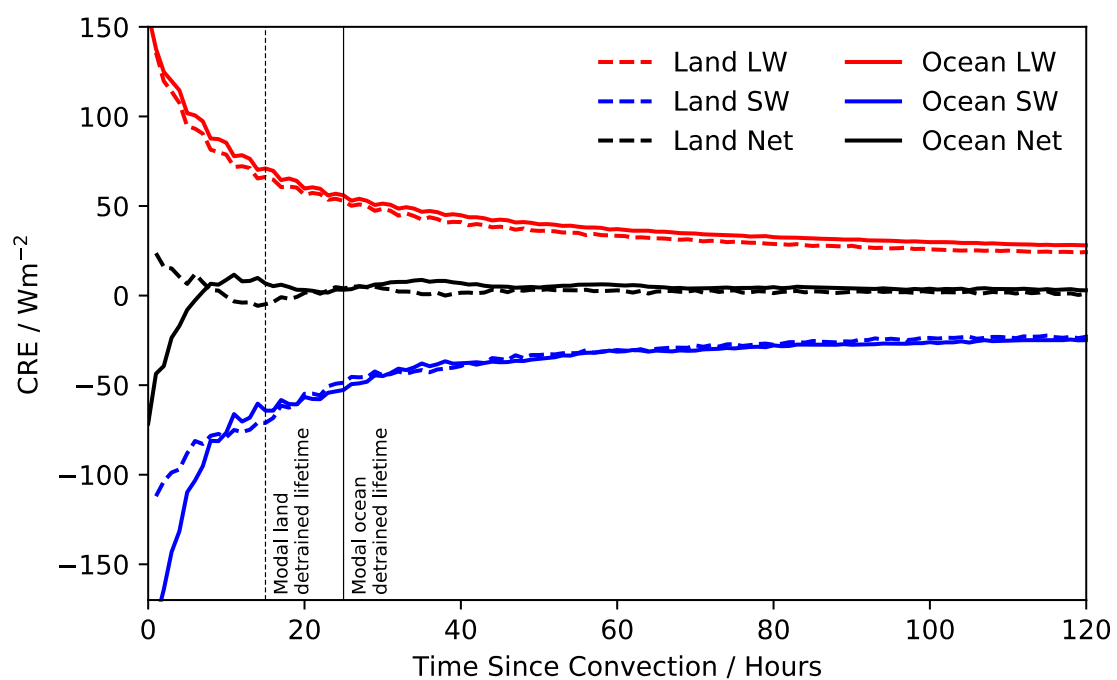

Figure S3: As in Figure 7, but controlling for albedo by only showing CRE of trajectories that exist over ocean, for both land-origin and ocean-origin trajectories.
